# Supplementary material for: Preferential dewetting of gold thin films on single walled carbon nanotubes to produce nanogap electrodes
Source: Royal Society of Chemistry journal article supplement (doi:10.1039/c6tc00824k), 2016-01-01
Supplement: c6tc00824k1.pdf [file c6tc00824k1.pdf]

## Electronic Supplementary Material (ESI)

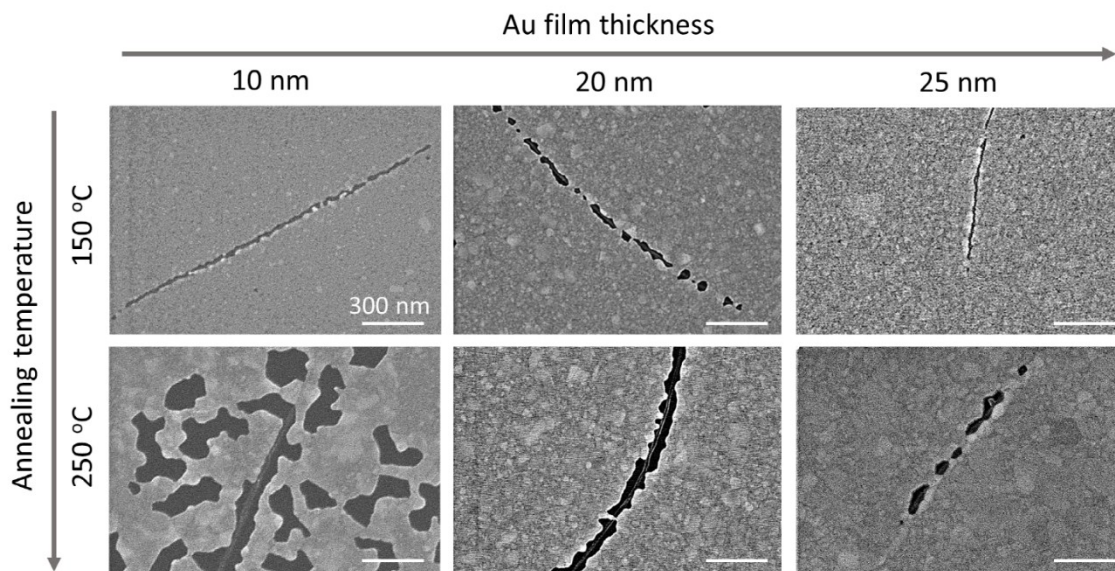

**Figure S1.** SEM observations of the evolution of Au film morphology for the film thickness from 10 to 25 nm (columns in the figure) and annealing temperatures of 150 or 250 °C (rows). Annealing time was 300 sec for all experiments. All images in the figure were taken at identical magnifications.

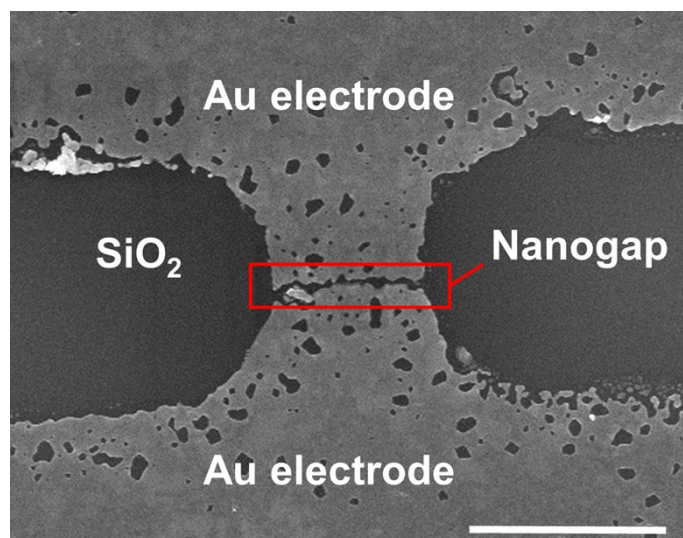

**Figure S2.** SEM image of the whole electrode structure with nanogap. 10 nm thick Au film was annealed at temperature of 150 °C for 300 sec. Scale bar is 2  $\mu\text{m}$ .
